# Supplementary material
Source: PubMed Central journal article supplement (PMC7317038)
Supplement: JB.00128-20-s0001.pdf [file JB.00128-20-s0001.pdf]

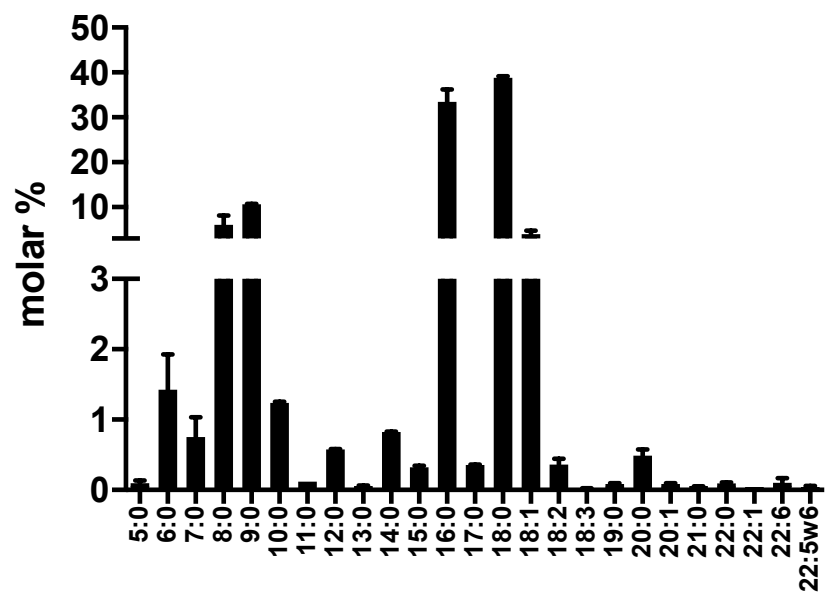

**Figure S1.** Fatty acid composition of filter-sterilized tryptic soy broth supplemented with 14mM glucose. (Becton Dickinson, Lot #2269294). Data represents the mean (n=2) with standard deviation.

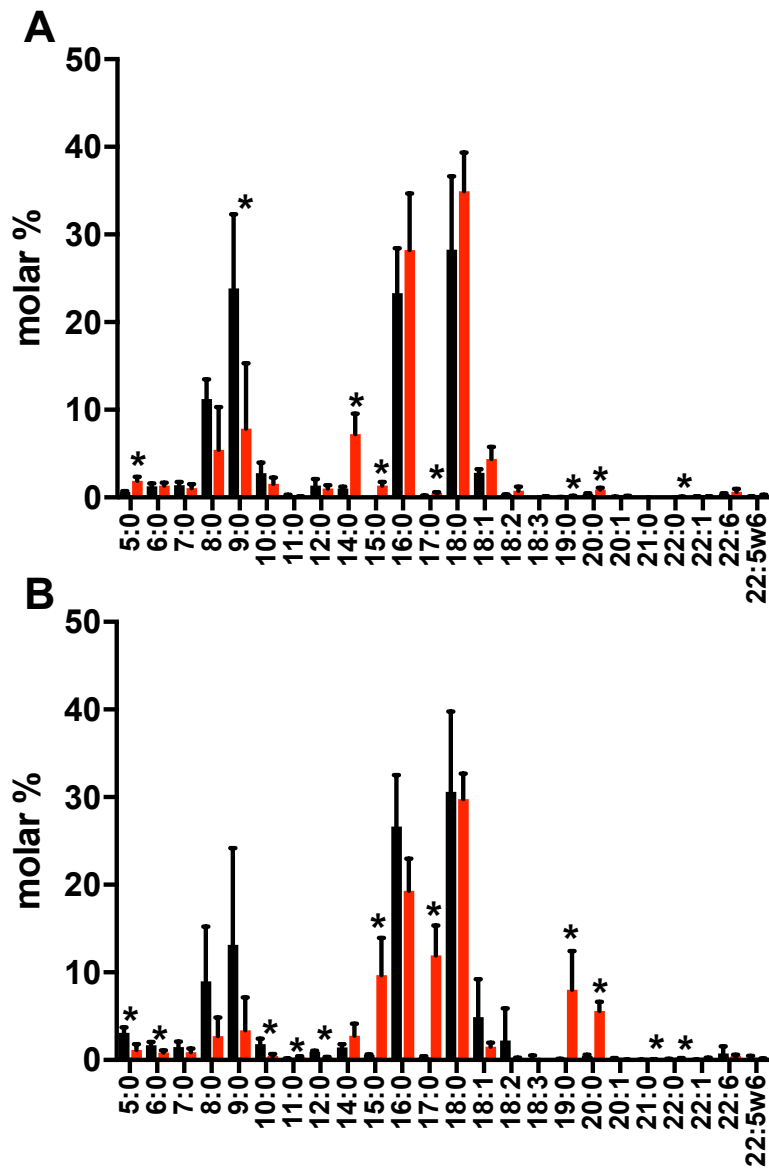

**Figure S2.** Identification of cellular free fatty acids in wildtype (black) and *fakA* mutant (red) grown for three (**A**) and six hours (**B**) in TSB+14mM glucose. Data is the mean (n=4) with standard deviation. “\*” indicates a significant difference (p<0.05) between stains by student t-test.

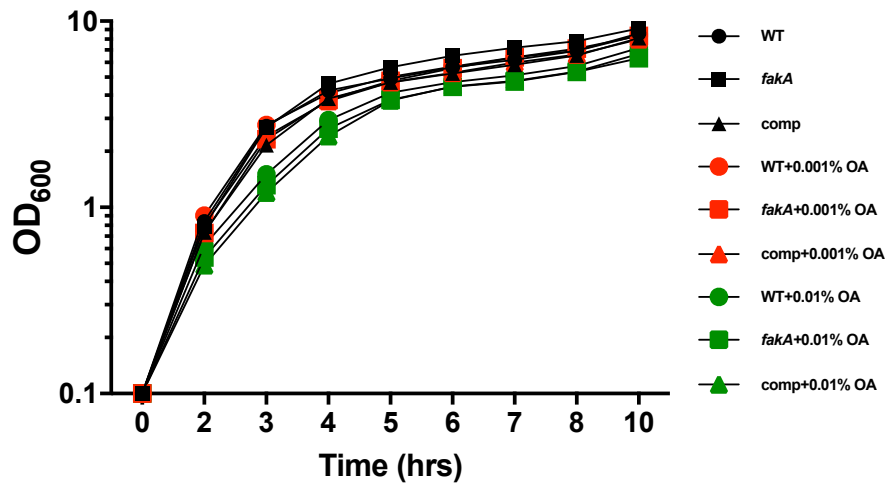

**Figure S3.** Growth of wildtype (circles), *fakA* mutant (squares), and *fakA* mutant complement with *fakA* on plasmid pJB165 (triangles) grown in TSB (black symbols), TSB+0.001% oleic acid (red symbols), and TSB+0.01% oleic acid (green symbols). Data represents the mean (n=4) with SD and is representative of three independent experiments. Error bars are present but are smaller than symbols.

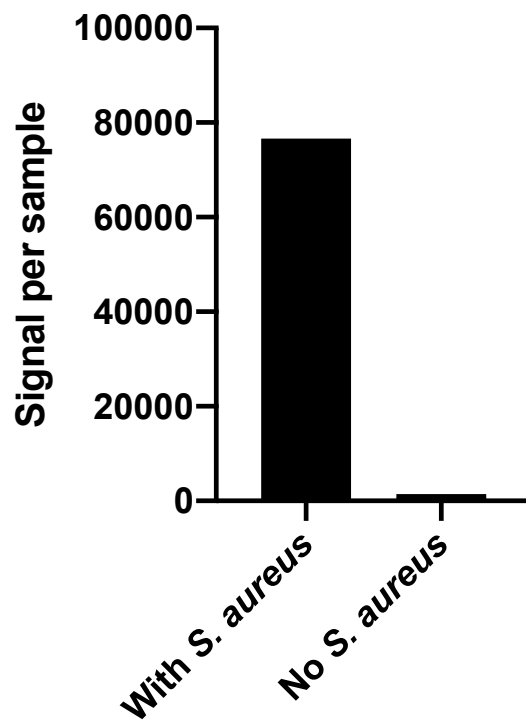

**Figure S4.** Lipid quantification from samples of mouse skin homogenate media with *S. aureus* bacteria or parallel sample treated identically but not inoculated with bacteria.

**Table S1.** Product ion analysis of pooled lipid extracts indicating most abundant acyl-chain composition of phosphatidylglycerol (PG) and lysyl-PG (LPG).

| PG species         | TSB       |             | TSB+0.01% OA |             |
|--------------------|-----------|-------------|--------------|-------------|
|                    | WT        | <i>fakA</i> | WT           | <i>fakA</i> |
| 30:0               | 15:0/15:0 | 15:0/15:0   | 15:0/15:0    | 15:0/15:0   |
| 31:0               | 15:0/16:0 | 15:0/16:0   | 15:0/16:0    | 15:0/16:0   |
| 32:1               |           |             | 14:0/18:1    |             |
| 32:0               | 15:0/17:0 | 15:0/17:0   | 15:0/17:0    | 15:0/17:0   |
| 33:1               |           |             | 15:0/18:1    |             |
| 33:0               | 15:0/18:0 | 15:0/18:0   | 15:0/18:0    | 15:0/18:0   |
| 34:1               |           |             | 14:0/20:1    |             |
| 34:0               | 15:0/19:0 | 15:0/19:0   | 15:0/19:0    | 15:0/19:0   |
| 35:1               |           |             | 15:0/20:1    |             |
| 35:0               | 15:0/20:0 | 15:0/20:0   | 15:0/20:0    | 15:0/20:0   |
| 36:0               | 15:0/21:0 | 15:0/21:0   | 15:0/21:0    | 15:0/21:0   |
| 37:1               |           |             |              |             |
| 37:0               |           | 15:0/22:0   | 15:0/22:0    | 17:0/20:0   |
| <b>LPG species</b> |           |             |              |             |
| 30:0               | 15:0/15:0 | 15:0/20:0   | 15:0/20:0    |             |
| 31:0               | 15:0/16:0 | 15:0/16:0   |              |             |
| 32:0               | 15:0/17:0 | 15:0/17:0   | 15:0/17:0    | 14:0/18:0   |
| 33:1               |           |             | 15:0/18:1    |             |
| 33:0               | 15:0/18:0 | 15:0/18:0   | 15:0/18:0    |             |
| 34:0               | 15:0/19:0 | 15:0/19:0   | 15:0/19:0    | 15:0/19:0   |
| 35:0               | 15:0/20:0 | 15:0/20:0   | 15:0/20:0    | 15:0/20:0   |
| 36:0               |           | 15:0/21:0   |              |             |

**Table S2.** Analysis of FAME data from wildtype and *fakA* mutant grown in TSB with and without 0.001% and 0.01% oleic acid (OA). Data is from pooled replicates (n=4) from each strain and growth environment.

|                   | Percentage of each compound |             |                 |             |                |             |
|-------------------|-----------------------------|-------------|-----------------|-------------|----------------|-------------|
|                   | TSB                         |             | TSB + 0.001% OA |             | TSB + 0.01% OA |             |
|                   | WT                          | <i>fakA</i> | WT              | <i>fakA</i> | WT             | <i>fakA</i> |
| iso 14:0          | 0.00                        | 0.67        | 1.83            | 1.48        | 0.00           | 0.00        |
| 14:0              | 0.00                        | 2.21        | 0.45            | 3.10        | 0.46           | 1.29        |
| iso 15:0          | 10.48                       | 10.26       | 10.85           | 10.23       | 2.69           | 2.52        |
| anteiso 15:0      | 25.18                       | 22.05       | 27.17           | 22.74       | 9.65           | 4.88        |
| iso 16:0          | 1.81                        | 2.29        | 2.01            | 2.58        | 0.32           | 0.77        |
| 16:0              | 3.01                        | 3.98        | 2.83            | 4.63        | 0.80           | 1.79        |
| iso 17:0          | 5.78                        | 3.94        | 4.53            | 3.26        | 0.70           | 1.02        |
| anteiso 17:0      | 8.18                        | 8.21        | 6.54            | 6.11        | 1.40           | 2.33        |
| iso 18:0          | 1.20                        | 0.95        | 1.26            | 1.10        | 0.31           | 0.34        |
| 18:0              | 15.79                       | 10.75       | 14.33           | 11.28       | 3.53           | 2.66        |
| 18:1              | 0.00                        | 0.00        | 0.20            | 0.41        | 52.80          | 71.11       |
| 18:2 isomer       | 0.00                        | 0.00        | 0.00            | 0.00        | 0.86           | 0.52        |
| iso 19:0          | 4.30                        | 3.59        | 3.66            | 3.01        | 3.50           | 1.80        |
| anteiso 19:0      | 3.93                        | 5.37        | 3.38            | 3.41        | 2.09           | 1.26        |
| 19:0              | 0.70                        | 0.40        | 0.78            | 0.64        | 0.52           | 0.17        |
| iso 20:0          | 0.42                        | 0.63        | 0.57            | 0.79        | 0.19           | 0.28        |
| 20:0              | 18.26                       | 22.71       | 18.14           | 23.43       | 5.97           | 6.92        |
| 20:1              | 0.00                        | 0.00        | 0.00            | 0.00        | 12.14          | 0.00        |
| iso 21:0          | 0.60                        | 0.81        | 0.52            | 0.62        | 0.39           | 0.21        |
| anteiso 21:0      | 0.36                        | 0.86        | 0.43            | 0.50        | 0.27           | 0.14        |
| 22:0              | 0.00                        | 0.32        | 0.20            | 0.39        | 0.00           | 0.00        |
| 22:1              | 0.00                        | 0.00        | 0.00            | 0.00        | 1.41           | 0.00        |
| % BCFA            | 62.25                       | 59.64       | 62.74           | 55.81       | 21.51          | 15.55       |
| % SCFA            | 37.75                       | 40.36       | 36.93           | 43.88       | 77.63          | 83.94       |
| BCFA/SCFA ratio   | 1.65                        | 1.48        | 1.70            | 1.27        | 0.28           | 0.19        |
| % Anteiso         | 37.66                       | 36.50       | 37.52           | 32.75       | 13.41          | 8.61        |
| % Iso             | 24.59                       | 23.14       | 25.22           | 23.06       | 8.10           | 6.94        |
| Anteiso/iso ratio | 1.53                        | 1.58        | 1.49            | 1.42        | 1.66           | 1.24        |
